# Supplementary material
Source: PubMed Central journal article supplement (PMC3092210)
Supplement: supp_1947601910376079_DS_10.1177_1947601910376079_Tables_S1-S6.pdf [file supp_1947601910376079_DS_10.1177_1947601910376079_Tables_S1-S6.pdf]

**SUPPLEMENTAL TABLE 1 - TOP 50 GENES UP-REGULATED - BY FOLD-CHANGE**

| Gene Symbol | Gene Name                                                                                         | Systematic Nomenclature | log <sub>2</sub> Fold Change | Adjusted p-Value |
|-------------|---------------------------------------------------------------------------------------------------|-------------------------|------------------------------|------------------|
| SEMA3D      | Sema domain, cytoplasmic, similar to dynein                                                       | NM_152754               | 3.47                         | 0.0245           |
| REG4        | Regenerating islet-derived family, member 4                                                       | NM_032044               | 3.09                         | 0.0119           |
| GBA2        | Beta-2 glucosidase                                                                                | NM_020944               | 2.94                         | 0.0186           |
| NUPR1       | Nuclear protein-1                                                                                 | NM_001042483            | 2.77                         | 0.0122           |
| ATF3        | Activating transcription factor 3                                                                 | NM_001040619            | 2.70                         | 0.0203           |
| BBC3        | BCL2 binding component 3                                                                          | NM_014417               | 2.67                         | 0.0091           |
| AGR2        | Anterior gradient homolog 2                                                                       | NM_006408               | 2.65                         | 0.0234           |
| TRIB3       | Tribbles homolog 3                                                                                | NM_021158               | 2.58                         | 0.0203           |
| FAM20A      | Family with sequence similarity 20, member A                                                      | NM_017565               | 2.53                         | 0.0426           |
| KIF26A      | Kinesin family member 26A                                                                         | BC009415                | 2.45                         | 0.0152           |
| KCNN4       | Potassium intermediate/small conductance calcium-activated channel, subfamily N, member 4         | NM_002250               | 2.38                         | 0.0264           |
| ARMC9       | armadillo repeat containing 9                                                                     | NM_025139               | 2.36                         | 0.0125           |
| DDIT3       | DNA-damage-inducible transcript 3                                                                 | NM_004083               | 2.34                         | 0.0125           |
| DDIT4       | DNA-damage-inducible transcript 4                                                                 | NM_019058               | 2.33                         | 0.0119           |
| JDP2        | Jun dimerization protein 2                                                                        | NM_130469               | 2.29                         | 0.0185           |
| HPGD        | Hydroxyprostaglandin dehydrogenase 15-(NAD)                                                       | NM_000860               | 2.28                         | 0.0125           |
| MAPT        | Microtubule-associated protein tau                                                                | NM_016835               | 2.26                         | 0.0186           |
| ASNS        | Asparagine synthetase and olfactory receptor, family 7, subfamily E, member 38 pseudogene         | NM_001673               | 2.25                         | 0.0487           |
| NUDT8       | Nudix (nucleoside diphosphate linked moiety X)-type motif 8                                       | NM_181843               | 2.23                         | 0.0146           |
| LFNG        | O-fucosylpeptide 3-beta-N-acetyl-glucosaminyltransferase                                          | NM_001040167            | 2.23                         | 0.0221           |
| TncRNA      | Trophoblast-derived noncoding RNA                                                                 | NR_002802               | 2.22                         | 0.0178           |
| KIAA1881    | KIAA1881                                                                                          | AB067468                | 2.12                         | 0.0321           |
| PRAC        | Small nuclear protein PRAC                                                                        | NM_032391               | 2.12                         | 0.0130           |
| ZNF467      | Zinc finger protein 467                                                                           | BC038972                | 2.09                         | 0.0286           |
| CDH1        | Cadherin 1, type 1, E-cadherin (epithelial)                                                       | NM_004360               | 2.08                         | 0.0336           |
| SLC7A11     | Solute carrier family 7, (cationic amino acid transporter) member 11                              | NM_014331               | 2.03                         | 0.0209           |
| ATF4        | Activating transcription factor 4                                                                 | NM_001675               | 2.03                         | 0.0176           |
| SESN2       | Sestrin 2                                                                                         | NM_031459               | 1.99                         | 0.0206           |
| FCGR2A      | Fc fragment of IgG, low affinity IIa, receptor (CD32)                                             | NM_021642               | 1.98                         | 0.0334           |
| CHRM3       | Cholinergic receptor, muscarinic 3                                                                | NM_000740               | 1.97                         | 0.0218           |
| IFIT2       | Interferon-induced protein with tetratricopeptide repeats 2                                       | NM_001547               | 1.97                         | 0.0396           |
| KIAA1370    | KIAA1370                                                                                          | NM_019600               | 1.96                         | 0.0267           |
| TRPM4       | Transient receptor potential cation channel, subfamily M, member 4                                | NM_017636               | 1.92                         | 0.0352           |
| RBCK1       | RanBP-type and C3HC4-type zinc finger containing                                                  | NM_031229               | 1.90                         | 0.0344           |
| KDR         | Kinase insert domain receptor (a type III receptor tyrosine kinase)                               | NM_002253               | 1.89                         | 0.0456           |
| PCK2        | Phosphoenolpyruvate carboxykinase 2                                                               | NM_004563               | 1.88                         | 0.0295           |
| CTH         | Cystathionase (cystathionine gamma-lyase)                                                         | NM_001902               | 1.81                         | 0.0320           |
| SMARCD3     | SWI/SNF related, matrix associated, actin dependent regulator of chromatin, subfamily d, member 3 | NM_003078               | 1.81                         | 0.0337           |
| PPL         | Periplakin                                                                                        | NM_002705               | 1.80                         | 0.0266           |
| FGF13       | Fibroblast growth factor 13                                                                       | NM_004114               | 1.80                         | 0.0270           |
| RNASE4      | Ribonuclease, RNase A family, 4                                                                   | NM_194430               | 1.79                         | 0.0493           |
| KRT15       | Keratin 15                                                                                        | NM_002275               | 1.77                         | 0.0330           |
| TFPI        | Tissue factor pathway inhibitor                                                                   | NM_001032281            | 1.75                         | 0.0427           |
| AXIIR       | Annexin II receptor-like                                                                          | NM_001014279            | 1.75                         | 0.0186           |
| KRT75       | Keratin 75                                                                                        | NM_004693               | 1.74                         | 0.0399           |
| MITF        | Microphthalmia-associated transcription factor                                                    | NM_198159               | 1.72                         | 0.0264           |
| SCD         | Stearoyl-CoA desaturase (delta-9-desaturase)                                                      | NM_005063               | 1.71                         | 0.0270           |
| SARS        | Seryl-tRNA synthetase                                                                             | NM_006513               | 1.71                         | 0.0329           |
| RHOBTB1     | Rho-related BTB domain containing 1                                                               | NM_014836               | 1.68                         | 0.0393           |
| NPNT        | Nephronectin                                                                                      | NM_001033047            | 1.67                         | 0.0372           |

**SUPPLEMENTAL TABLE 2 - TOP 50 GENES DOWN-REGULATED - BY FOLD-CHANGE**

| Gene Symbol | Gene Name                                                                            | Systematic Nomenclature | log <sub>2</sub> Fold Change | Adjusted p-Value |
|-------------|--------------------------------------------------------------------------------------|-------------------------|------------------------------|------------------|
| GLIS3       | GLIS family zinc finger 3                                                            | NM_001042413            | -2.77                        | 0.0395           |
| E2F1        | E2F transcription factor 1                                                           | NM_005225               | -2.78                        | 0.0389           |
| DHFR        | Dihydrofolate reductase                                                              | NM_000791               | -2.79                        | 0.0178           |
| GINS2       | GINS complex subunit 2 (Psf2 homolog)                                                | NM_016095               | -2.83                        | 0.0223           |
| TNFAIP2     | Tumor necrosis factor, alpha-induced protein 2                                       | NM_006291               | -2.84                        | 0.0091           |
| ESCO2       | Establishment of cohesion 1 homolog 2                                                | NM_001017420            | -2.86                        | 0.0258           |
| CDC2        | Cell division cycle 2, G1 to S and G2 to M                                           | NM_001786               | -2.88                        | 0.0332           |
| PRIM1       | Primase, polypeptide 1                                                               | NM_000946               | -2.95                        | 0.0158           |
| ID1         | Inhibitor of DNA binding 1, dominant negative helix-loop-helix protein               | NM_002165               | -2.96                        | 0.0372           |
| FAM54A      | Family with sequence similarity 54, member A                                         | NM_138419               | -2.97                        | 0.0122           |
| PCNA        | Proliferating cell nuclear antigen                                                   | NM_002592               | -3.00                        | 0.0091           |
| G0S2        | G0/G1 switch 2                                                                       | NM_015714               | -3.01                        | 0.0091           |
| KNTC2       | Kinetochore complex component (NDC80 homolog)                                        | NM_006101               | -3.02                        | 0.0146           |
| DCC1        | Defective in sister chromatid cohesion homolog 1                                     | NM_024094               | -3.03                        | 0.0125           |
| TFPI2       | Tissue factor pathway inhibitor 2                                                    | NM_006528               | -3.04                        | 0.0170           |
| ATAD2       | ATPase family, AAA domain containing 2                                               | NM_014109               | -3.05                        | 0.0426           |
| ZWINT       | ZW10 interactor                                                                      | NM_001005414            | -3.06                        | 0.0091           |
| CCDC74B     | Coiled-coil domain containing 74B                                                    | NM_207310               | -3.07                        | 0.0091           |
| UHRF1       | Ubiquitin-like, containing PHD and RING finger domains, 1                            | NM_013282               | -3.08                        | 0.0122           |
| AKR1B10     | Aldose reductase family 1, member B10                                                | NM_020299               | -3.08                        | 0.0270           |
| LCP1        | Lymphocyte cytosolic protein 1 (L-plastin)                                           | NM_002298               | -3.19                        | 0.0245           |
| NCAPG       | Non-SMC condensin I complex, subunit G                                               | NM_022346               | -3.21                        | 0.0119           |
| SGK         | Serum/glucocorticoid regulated kinase                                                | NM_005627               | -3.26                        | 0.0146           |
| NFKBIA      | Nuclear factor of kappa light polypeptide gene enhancer in B-cells inhibitor, alpha. | NM_020529               | -3.27                        | 0.0091           |
| MAD2L1      | MAD2 mitotic arrest deficient-like 1                                                 | NM_002358               | -3.29                        | 0.0360           |
| PI3         | Peptidase inhibitor 3                                                                | NM_002638               | -3.30                        | 0.0134           |
| CDC45L      | CDC45 cell division cycle 45-like                                                    | NM_003504               | -3.32                        | 0.0342           |
| RNF182      | Ring finger protein 182                                                              | NM_152737               | -3.32                        | 0.0224           |
| KIAA0101    | KIAA0101 and casein kinase 1, gamma 1                                                | NM_014736               | -3.32                        | 0.0334           |
| RAD51       | RAD51 homolog (RecA homolog)                                                         | NM_002875               | -3.33                        | 0.0099           |
| SPBC25      | SPC25, NDC80 kinetochore complex component, homolog                                  | NM_020675               | -3.35                        | 0.0125           |
| DTL         | Denticleless homolog                                                                 | NM_016448               | -3.37                        | 0.0144           |
| PLAU        | Plasminogen activator, urokinase                                                     | NM_002658               | -3.40                        | 0.0271           |
| C3          | Complement component 3                                                               | NM_000064               | -3.43                        | 0.0176           |
| CDH11       | Cadherin 11, type 2, OB-cadherin                                                     | NM_001797               | -3.50                        | 0.0447           |
| TK1         | Thymidine kinase 1, soluble                                                          | NM_003258               | -3.57                        | 0.0091           |
| GJB2        | Gap junction protein, beta 2                                                         | NM_004004               | -3.60                        | 0.0264           |
| SAA1        | Serum amyloid A1                                                                     | NM_000331               | -3.60                        | 0.0237           |
| BIRC3       | Baculoviral IAP repeat-containing 3                                                  | NM_001165               | -3.63                        | 0.0152           |
| RRM2        | Ribonucleotide reductase M2 polypeptide                                              | NM_001034               | -3.65                        | 0.0227           |
| BEX1        | Brain expressed, X-linked 1                                                          | NM_018476               | -3.99                        | 0.0423           |
| SERPINB4    | Serpin peptidase inhibitor, clade B, member 4                                        | NM_002974               | -4.09                        | 0.0267           |
| COL13A1     | Collagen, type XIII, alpha 1                                                         | NM_005203               | -4.09                        | 0.0264           |
| CXCL2       | Chemokine (C-X-C motif) ligand 2                                                     | NM_002089               | -4.13                        | 0.0134           |
| LCN2        | Lipocalin 2 (oncogene 24p3)                                                          | NM_005564               | -4.18                        | 0.0178           |
| CYB5R2      | Cytochrome b5 reductase 2                                                            | NM_016229               | -4.53                        | 0.0122           |
| TYMS        | Thymidylate synthetase                                                               | NM_001071               | -4.53                        | 0.0237           |
| IL1B        | Interleukin 1, beta                                                                  | NM_000576               | -5.15                        | 0.0091           |
| SERPINB3    | Serpin peptidase inhibitor, clade B, member 3                                        | NM_006919               | -5.56                        | 0.0091           |
| CXCL1       | Chemokine (C-X-C motif) ligand 1                                                     | NM_001511               | -6.18                        | 0.0091           |

**SUPPLEMENTAL TABLE 3 - BIOLOGICAL PROCESS GO TERMS THAT HAVE A SIGNIFICANT OVER-REPRESENTATION ( $P < 0.001$ ) OF GENES FOUND TO BE SIGNIFICANTLY DIFFERENTIALLY EXPRESSED BY *PRKCZ* KNOCKDOWN**

| <b>GO ID</b> | <b><i>p</i>-value</b> | <b>Term</b>                                                           |
|--------------|-----------------------|-----------------------------------------------------------------------|
| GO:0022402   | 2.60E-26              | cell cycle process                                                    |
| GO:0000279   | 1.67E-22              | M phase                                                               |
| GO:0000278   | 9.22E-20              | mitotic cell cycle                                                    |
| GO:0051301   | 9.25E-19              | cell division                                                         |
| GO:0006260   | 1.61E-17              | DNA replication                                                       |
| GO:0006281   | 7.17E-15              | DNA repair                                                            |
| GO:0007067   | 1.21E-14              | mitosis                                                               |
| GO:0007059   | 1.06E-10              | chromosome segregation                                                |
| GO:0006950   | 6.50E-09              | response to stress                                                    |
| GO:0000724   | 6.64E-08              | double-strand break repair via homologous recombination               |
| GO:0006297   | 4.49E-07              | nucleotide-excision repair, DNA gap filling                           |
| GO:0007051   | 9.54E-07              | spindle organization and biogenesis                                   |
| GO:0007093   | 1.12E-06              | mitotic cell cycle checkpoint                                         |
| GO:0007049   | 3.03E-06              | cell cycle                                                            |
| GO:0051303   | 4.19E-06              | establishment of chromosome localization                              |
| GO:0000070   | 1.10E-05              | mitotic sister chromatid segregation                                  |
| GO:0006996   | 1.41E-05              | organelle organization and biogenesis                                 |
| GO:0000075   | 3.15E-05              | cell cycle checkpoint                                                 |
| GO:0007126   | 4.53E-05              | meiosis                                                               |
| GO:0051052   | 4.53E-05              | regulation of DNA metabolic process                                   |
| GO:0006268   | 5.50E-05              | DNA unwinding during replication                                      |
| GO:0051321   | 5.58E-05              | meiotic cell cycle                                                    |
| GO:0006270   | 5.93E-05              | DNA replication initiation                                            |
| GO:0007018   | 5.95E-05              | microtubule-based movement                                            |
| GO:0048015   | 0.000105762           | phosphoinositide-mediated signaling                                   |
| GO:0006139   | 0.000107285           | nucleobase, nucleoside, nucleotide and nucleic acid metabolic process |
| GO:0032392   | 0.000107904           | DNA geometric change                                                  |
| GO:0007088   | 0.000111507           | regulation of mitosis                                                 |
| GO:0051329   | 0.000120198           | interphase of mitotic cell cycle                                      |
| GO:0031577   | 0.00012838            | spindle checkpoint                                                    |
| GO:0042770   | 0.00018963            | DNA damage response, signal transduction                              |
| GO:0031570   | 0.000190839           | DNA integrity checkpoint                                              |
| GO:0008156   | 0.00024533            | negative regulation of DNA replication                                |
| GO:0007017   | 0.000247312           | microtubule-based process                                             |
| GO:0006310   | 0.000255543           | DNA recombination                                                     |
| GO:0000079   | 0.000272498           | regulation of cyclin-dependent protein kinase activity                |
| GO:0006312   | 0.000349485           | mitotic recombination                                                 |
| GO:0007079   | 0.000356715           | mitotic chromosome movement towards spindle pole                      |
| GO:0030261   | 0.000581281           | chromosome condensation                                               |
| GO:0006261   | 0.00079167            | DNA-dependent DNA replication                                         |

**SUPPLEMENTAL TABLE 4 - MOLECULAR FUNCTION GO TERMS THAT HAVE A SIGNIFICANT OVER-REPRESENTATION ( $P < 0.001$ ) OF GENES FOUND TO BE SIGNIFICANTLY DIFFERENTIALLY EXPRESSED BY *PRKC-Z* KNOCKDOWN**

| <b>GO ID</b> | <b><i>p</i>-value</b> | <b>Term</b>                                                        |
|--------------|-----------------------|--------------------------------------------------------------------|
| GO:0046870   | 7.24E-06              | cadmium ion binding                                                |
| GO:0005515   | 3.25E-05              | protein binding                                                    |
| GO:0003689   | 5.89E-05              | DNA clamp loader activity                                          |
| GO:0005524   | 6.13E-05              | ATP binding                                                        |
| GO:0030554   | 6.34E-05              | adenyl nucleotide binding                                          |
| GO:0008094   | 6.67E-05              | DNA-dependent ATPase activity                                      |
| GO:0003777   | 7.26E-05              | microtubule motor activity                                         |
| GO:0005507   | 0.000196362           | copper ion binding                                                 |
| GO:0016725   | 0.000200742           | oxidoreductase activity, acting on CH or CH2 groups                |
| GO:0003680   | 0.000333573           | AT DNA binding                                                     |
| GO:0004360   | 0.000333573           | glutamine-fructose-6-phosphate transaminase (isomerizing) activity |
| GO:0003678   | 0.000408806           | DNA helicase activity                                              |
| GO:0043142   | 0.000988605           | single-stranded DNA-dependent ATPase activity                      |

**SUPPLEMENTAL TABLE 5 - TOP FOUR NETWORKS AFFECTED BY siRNA KNOCKDOWN**

| <b>ID</b> | <b>MOLECULES IN NETWORK</b>                                                                                                                                                                                                                                                                                         | <b>SCORE</b> | <b>FOCUS MOLECULES</b> | <b>TOP FUNCTIONS</b>                                                                                                                        |
|-----------|---------------------------------------------------------------------------------------------------------------------------------------------------------------------------------------------------------------------------------------------------------------------------------------------------------------------|--------------|------------------------|---------------------------------------------------------------------------------------------------------------------------------------------|
| 1         | ACAT1, ADFP, Angiotensin II receptor type 1, APOBEC3F, APOBEC3G, ATF3, BIRC2, BIRC3, C8, CCL20, CXCL10, GBP1 (includes EG:2633), ICAM1, Ifn gamma, IKK, IL1B, INDO, Interferon alpha, IRF7, LCP1, LDL, MAP4K4, MHC Class II, MX1, NDN, NFE2L1, Nfkb-RelA, P2RX7, PMAIP1, S100A8, S100A9, Sod, SYK/ZAP, TYROBP, UAP1 | 42           | 25                     | Cell-To-Cell Signaling and Interaction, Hematological System Development and Function, Immune and Lymphatic System Development and Function |
| 2         | ARRB1, ASB2, B2M, Cbp/p300, CCDC90B, CDKN2C, Ck2, CRCT1, DNAJC10, EEF1A1, EGR1, Histone h3, Hsp70, Hsp90, HSPA5, Jnk, MAGEA11, MAOB, MCFD2, MRE11A, NFKBIA, NPM1 (includes EG:4869), PDGF BB, POLR1E, Proteasome, PRSS35, PSMB8, PSMB9, RNA polymerase II, SGK1, STC2, TPM4, UBD, Ubiquitin, ZNF259                 | 42           | 25                     | Cancer, Cell Death, Cellular Growth and Proliferation                                                                                       |
| 3         | ADRA2C, CAMK2N1, CCL2, COL13A1, CXCL3, DPYSL2, ERK, Fibrin, FN1, HTRA1, IL1, IL8, INHBA, Interferon beta, LCN2, LOXL1, Mac1, Mmp, MMP1 (includes EG:4312), MTSS1, NAMPT, Pdgf, PDGFC, PLAT, PLAU, PTPRR, RANBP9, SAA1, SAA2, SAA4, SAA@, Sos, SP100, STAT, Tgf beta                                                 | 39           | 24                     | Cardiovascular Disease, Digestive System Development and Function, Hepatic System Development and Function                                  |
| 4         | B4GALT1, BEX1 (includes EG:55859), C3, C1q, CFB, Complement component 1, CXCL2, CXCL6, DBT, ETS, GBP2, HLA-C, HLA-G, I kappa b kinase, IFN Beta, IgG, Igm, IHPK2, IL12, IL32, KYNU, LMO2, LTB, NF-&kappa;B, NFkB, peptidase, PI3, PPP2R5C, PTX3, ROBO4, S100A4, SLIT2, Tlr, TNIP1, VISA                             | 37           | 23                     | Protein Synthesis, Cellular Growth and Proliferation, Hematological System Development and Function                                         |

A score of  $x$  is  $p=10^{-x}$ .  $x$ : score,  $p$ :  $p$ -value.

**SUPPLEMENTAL TABLE 6**

**PREVIOUS siRNA KNOCKDOWN STUDIES AND TARGETS FOR *PRKC-ζ***

| <b>Human cell-line</b> | <b>siRNA source</b> | <b>Published DNA target or siRNA sequence employed</b> | <b>Exon location within human <i>PRKC-ζ</i></b> | <b>Human <i>PRKC-ζ</i><sup>+</sup> variants</b> | <b>Other genes identified</b>    | <b>Reference</b>                       |
|------------------------|---------------------|--------------------------------------------------------|-------------------------------------------------|-------------------------------------------------|----------------------------------|----------------------------------------|
| 18Co                   | Ambion              | 5'-AAGACGACACATGTCTCTCACCTGTCTC-3'                     | 8                                               | a,b,h,l,vf,vl                                   | <i>MARKLOY</i><br><i>ZFYVE26</i> | (Di Mari <i>et al</i> , 2003)          |
| 786-O                  | Bespoke             | 5'-GTGAGAGACATGTGTCGTCTTCAA-3'                         | 8                                               | a,b,h,l,vf,vl                                   | <i>KITARI</i>                    | (Datta <i>et al</i> , 2004)            |
| HUVECs                 | Upstate*            | <i>[Sequence not defined]</i>                          | -                                               | -                                               | -                                | (Reese <i>et al</i> , 2005)            |
| MRC-5                  | Invitrogen*         | <i>[Sequence not defined]</i>                          | -                                               | -                                               | -                                | (Hernandez-Pigeon <i>et al</i> , 2005) |
| TSU-pr1 <sup>*P</sup>  | Dharmacon*          | <i>[Sequence not defined]</i>                          | -                                               | -                                               | -                                | (Even-Faitelson <i>et al</i> , 2006)   |
| L6 myotubes            | Dharmacon           | 5'-GAACGAUGGUGUAGACCUU-3'                              | N/I                                             | N/A                                             | N/A                              | (Sajan <i>et al</i> , 2006)            |
|                        |                     | 5'-GGAAACAUGACAAUAUCAA-3'                              | N/I                                             | N/A                                             | <i>REYCHARBY</i>                 |                                        |
|                        |                     | 5'-GCUGAGAUCUGUAUCGCUC-3'                              | N/I                                             | N/A                                             | N/A                              |                                        |
|                        |                     | 5'-GCAUGCCGAUGGACACAAUU-3'                             | N/I                                             | N/A                                             | N/A                              |                                        |
| Caco-2                 | Ambion              | 5'-GGAAGUGAGAGAACAUGUGU-5'                             | N/I                                             | N/A                                             | <i>KERARA</i>                    | (Mustafi <i>et al</i> , 2006)          |
| HeLa                   | Dharmacon*          | <i>[Sequence not defined]</i>                          | -                                               | -                                               | -                                | (Liu <i>et al</i> , 2006)              |
| JAR                    | Ambion*             | <i>[Sequence not defined]</i>                          | -                                               | -                                               | -                                | (Zhang <i>et al</i> , 2006)            |
| A431                   | Bespoke             | 5'-GTGAGAGACATGTGTCGTCTTCAA-3'                         | 8                                               | a,b,h,l,vf,vl                                   | <i>KITARI</i>                    | (Singh <i>et al</i> , 2007)            |

|                     |             |                             |     |                                              |      |                                    |
|---------------------|-------------|-----------------------------|-----|----------------------------------------------|------|------------------------------------|
| Chondrocytes        | Bespoke     | 5'-GAGAAGCACGTGTTTGAGC-3'   | 8   | a,b,c,d,f,g,h,p,va,-<br>b                    | CD93 | (Chockalingam <i>et al</i> , 2007) |
| HUVECs              | Santa Cruz* | [Sequence not defined]      | -   | -                                            | -    | (Choi <i>et al</i> , 2008)         |
| Caco-2              | Bespoke     | 5'-AUGAUCAGAUCUAUGCCAUGA-3' | N/I | N/A                                          | N/A  | (Frankenberg <i>et al</i> , 2008)  |
| Huh7                | Ambion*     | [Sequence not defined]      | -   | -                                            | -    | (Prudencio <i>et al</i> , 2008)    |
| LN-229              | Bespoke     | 5'-GAGGAAGTGAGAGACATGTGT-3' | 8   | a,b,h,l,vf,vl                                | None | (Guo <i>et al</i> , 2009a)         |
| THP-1               | Bespoke     | 5'-GAGGAAGTGAGAGACATGTGT-3' |     | a,b,h,l,vf,vl                                | None | (Guo <i>et al</i> , 2009b)         |
| Caco-2              | Bespoke     | 5'-GACGACAAGAACGAGGACG-3'   | 50  | a,b,c,d,f,g,h,k,p,t,-<br>b,vc,vd,vh,vj,vo,vr | None | (Thongon <i>et al</i> , 2009)      |
| AKI                 | Invitrogen* | [Sequence not defined]      | -   | -                                            | -    | (Kai <i>et al</i> , 2009)          |
| PC3-M <sup>*P</sup> | Bespoke     | 5'-GTGAGAGACATGTGTCGTCTT-3' | 8   | a,b,h,l,vf,vl                                | None | (Yao, 2010)                        |

**KEY:** \*P : Prostatic carcinoma cells  
N/I : Not identified  
N/A : Not applicable  
† : AceView Release 36, April 2007  
\* : Sequence could not be identified or accurately predicted from information provided
